# Supplementary material for: Comorbidity in Adult Patients Hospitalized with Type 2 Diabetes in Northeast China: An Analysis of Hospital Discharge Data from 2002 to 2013
Source: Hindawi journal article supplement (doi:10.1155/2016/1671965), 2016-01-01
Supplement: f1 [file 1671965.f1.pdf]

**Table S1.** Absolute and relative co-occurrence risk for 27 major comorbidities of type 2 diabetes mellitus

| <b>Disease</b>                                     | <b>CCS code</b> | <b>ACoR</b> | <b>RCoR</b> |
|----------------------------------------------------|-----------------|-------------|-------------|
| Thyroid disorders                                  | 48              | 2.8%        | 1.14        |
| Nutritional deficiencies                           | 53              | 12.5%       | 3.48        |
| Fluid & electrolyte disorders                      | 55              | 2.7%        | 1.60        |
| Other nutritional, endocrine & metabolic disorders | 58              | 1.7%        | 2.15        |
| Cataract                                           | 86              | 3.0%        | 1.62        |
| Other nervous system disorders                     | 95              | 2.5%        | 1.62        |
| Essential hypertension                             | 98              | 58.4%       | 2.90        |
| Acute myocardial infarction                        | 100             | 2.1%        | 2.22        |
| Coronary atherosclerosis & other heart disease     | 101             | 23.9%       | 2.39        |
| Conduction disorders                               | 105             | 1.1%        | 1.45        |
| Cardiac dysrhythmias                               | 106             | 6.9%        | 1.23        |
| Congestive heart failure, nonhypertensivw          | 108             | 9.9%        | 1.77        |
| Acute cerebrovascular disease                      | 109             | 16.9%       | 2.04        |
| Occlusion or stenosis of precerebral arteries      | 110             | 2.3%        | 3.41        |
| Other & ill-defined cerebrovascular disease        | 111             | 6.5%        | 2.37        |
| Transient cerebral ischemia                        | 112             | 7.3%        | 1.75        |
| Peripheral & visceral atheroscleros                | 114             | 3.3%        | 4.21        |
| Pneumonia                                          | 122             | 4.5%        | 1.30        |
| Acute bronchitis                                   | 125             | 2.3%        | 1.73        |
| Other upper respiratory infections                 | 126             | 2.6%        | 1.43        |
| Other lower respiratory disease                    | 133             | 4.9%        | 1.41        |
| Biliary tract disease                              | 149             | 4.5%        | 1.02        |
| Other liver diseases                               | 151             | 8.0%        | 1.99        |
| Noninfectious gastroenteritis                      | 154             | 1.3%        | 1.12        |
| Chronic renal failure                              | 158             | 4.4%        | 2.77        |
| Urinary tract infections                           | 159             | 6.5%        | 2.91        |
| Skin & subcutaneous tissue infections              | 197             | 1.2%        | 1.88        |

CCS: Clinical Classifications Software; ACoR: absolute co-occurrence risk; RCoR: relative co-occurrence risk

**Table S2.** Absolute and relative co-occurrence risk of comorbidities of type 2 diabetes mellitus for men and women and overall

| Disease                                                  | CCS code | Overall |      |    | Men    |                       |    | Women  |      |    |
|----------------------------------------------------------|----------|---------|------|----|--------|-----------------------|----|--------|------|----|
|                                                          |          | ACoR    | RCoR | MC | ACoR   | RCoR                  | MC | ACoR   | RCoR | MC |
| Thyroid disorders                                        | 48       | 2.76%   | 1.14 | Y  | 1.79%  | 1.50                  | Y  | 3.60%  | 1.03 | N  |
| Other endocrine disorders                                | 51       | 1.02%#  | 3.85 | N  | 0.88%  | 3.57                  | N  | 1.15%  | 4.07 | Y  |
| Nutritional deficiencies                                 | 53       | 12.51%  | 3.48 | Y  | 11.95% | 3.79                  | Y  | 13.00% | 3.26 | Y  |
| Fluid & electrolyte disorders                            | 55       | 2.66%   | 1.60 | Y  | 2.44%  | 1.41                  | Y  | 2.85%  | 1.79 | Y  |
| Other nutritional, endocrine & metabolic disorders       | 58       | 1.69%   | 2.15 | Y  | 2.06%  | 1.98                  | Y  | 1.37%  | 2.45 | Y  |
| Deficiency and other anemia                              | 59       | 1.72%   | 0.79 | N  | 1.57%  | 1.16                  | Y  | 1.85%  | 0.64 | N  |
| Cataract                                                 | 86       | 2.97%   | 1.62 | Y  | 2.55%  | 1.37                  | Y  | 3.34%  | 1.85 | Y  |
| Other eye disorders                                      | 91       | 1.03%*  | 1.20 | N  | 0.99%  | 1.02 <sup>&amp;</sup> | N  | 1.07%  | 1.39 | Y  |
| Other nervous system disorders                           | 95       | 2.48%   | 1.62 | Y  | 2.49%  | 1.37                  | Y  | 2.47%  | 1.94 | Y  |
| Heart valve disorders                                    | 96       | 0.91%   | 0.94 | N  | 0.73%  | 0.80                  | N  | 1.07%  | 1.06 | Y  |
| Essential hypertension                                   | 98       | 58.39%  | 2.90 | Y  | 53.61% | 2.55                  | Y  | 62.57% | 3.24 | Y  |
| Acute myocardial infarction                              | 100      | 2.13%   | 2.22 | Y  | 2.45%  | 1.77                  | Y  | 1.85%  | 3.20 | Y  |
| Coronary atherosclerosis & other heart disease           | 101      | 23.89%  | 2.39 | Y  | 21.41% | 2.03                  | Y  | 26.07% | 2.73 | Y  |
| Conduction disorders                                     | 105      | 1.12%   | 1.45 | Y  | 1.35%  | 1.38                  | Y  | 0.92%  | 1.57 | N  |
| Cardiac dysrhythmias                                     | 106      | 6.87%   | 1.23 | Y  | 7.02%  | 1.12                  | Y  | 6.74%  | 1.36 | Y  |
| Congestive heart failure, Nnhypertensivw                 | 108      | 9.90%   | 1.77 | Y  | 8.60%  | 1.46                  | Y  | 11.05% | 2.08 | Y  |
| Acute cerebrovascular disease                            | 109      | 16.93%  | 2.04 | Y  | 17.77% | 1.73                  | Y  | 16.20% | 2.48 | Y  |
| Occlusion or steNsis of precerebral arteries             | 110      | 2.34%   | 3.41 | Y  | 2.79%  | 3.18                  | Y  | 1.95%  | 3.77 | Y  |
| Other & ill-defined cerebrovascular disease              | 111      | 6.49%   | 2.37 | Y  | 7.34%  | 2.09                  | Y  | 5.74%  | 2.79 | Y  |
| Transient cerebral ischemia                              | 112      | 7.31%   | 1.75 | Y  | 7.06%  | 1.72                  | Y  | 7.52%  | 1.77 | Y  |
| Peripheral & visceral atheroscleros                      | 114      | 3.25%   | 4.21 | Y  | 4.04%  | 3.96                  | Y  | 2.56%  | 4.63 | Y  |
| Pneumonia                                                | 122      | 4.53%   | 1.30 | Y  | 5.07%  | 1.20                  | Y  | 4.05%  | 1.43 | Y  |
| Acute bronchitis                                         | 125      | 2.25%   | 1.73 | Y  | 2.15%  | 1.68                  | Y  | 2.34%  | 1.77 | Y  |
| Other upper respiratory infections                       | 126      | 2.55%   | 1.43 | Y  | 2.46%  | 1.31                  | Y  | 2.63%  | 1.54 | Y  |
| Chronic obstructive pulmonary disease and bronchiectasis | 127      | 4.65%   | 0.93 | N  | 5.09%  | 0.84                  | N  | 4.26%  | 1.06 | Y  |
| Other lower respiratory disease                          | 133      | 4.94%   | 1.41 | Y  | 5.56%  | 1.25                  | Y  | 4.39%  | 1.67 | Y  |
| Biliary tract disease                                    | 149      | 4.53%   | 1.02 | Y  | 4.55%  | 1.00                  | N  | 4.51%  | 1.05 | Y  |
| Other liver diseases                                     | 151      | 7.97%   | 1.99 | Y  | 9.17%  | 1.89                  | Y  | 6.92%  | 2.13 | Y  |
| Noninfectious gastroenteritis                            | 154      | 1.33%   | 1.12 | Y  | 1.24%  | 1.00                  | N  | 1.42%  | 1.23 | Y  |

|                                       |     |       |      |   |       |      |   |       |      |   |
|---------------------------------------|-----|-------|------|---|-------|------|---|-------|------|---|
| Chronic renal failure                 | 158 | 4.42% | 2.77 | Y | 4.61% | 2.41 | Y | 4.25% | 3.23 | Y |
| Urinary tract infections              | 159 | 6.51% | 2.91 | Y | 3.00% | 1.85 | Y | 9.58% | 3.44 | Y |
| Hyperplasia of prostate               | 164 | 1.75% | 1.20 | N | 3.75% | 1.21 | Y | /     | /    | N |
| Skin & subcutaneous tissue infections | 197 | 1.21% | 1.88 | Y | 1.59% | 1.78 | Y | 0.87% | 2.08 | N |

CCS: Clinical Classifications Software; ACoR: absolute co-occurrence risk; RCoR: relative co-occurrence risk; MC: Major comorbidity

# p-value = 0.132 compared to 1%; \* p-value = 0.024 compared to 1%; & p-value = 0.861 compared to 1

**Table S3.** Absolute and relative co-occurrence risk of comorbidities of type 2 diabetes mellitus for all patients and patients aged 18-29 and 30-39

| Disease                                                  | CCS code | Overall            |      |    | 18-29 years |        |    | 30-39 years |       |    |
|----------------------------------------------------------|----------|--------------------|------|----|-------------|--------|----|-------------|-------|----|
|                                                          |          | ACoR               | RCoR | MC | ACoR        | RCoR   | MC | ACoR        | RCoR  | MC |
| Thyroid disorders                                        | 48       | 2.76%              | 1.14 | Y  | 3.02%       | 3.94   | Y  | 2.95%       | 1.61  | Y  |
| Other endocrine disorders                                | 51       | 1.02% <sup>#</sup> | 3.85 | N  | 1.88%       | 12.85  | N  | 1.01%       | 4.50  | Y  |
| Nutritional deficiencies                                 | 53       | 12.51%             | 3.48 | Y  | 24.57%      | 104.61 | Y  | 24.27%      | 23.89 | Y  |
| Fluid & electrolyte disorders                            | 55       | 2.66%              | 1.60 | Y  | 3.57%       | 7.80   | Y  | 2.37%       | 3.98  | Y  |
| Other nutritional, endocrine & metabolic disorders       | 58       | 1.69%              | 2.15 | Y  | 7.98%       | 31.24  | Y  | 4.66%       | 12.29 | Y  |
| Deficiency and other anemia                              | 59       | 1.72%              | 0.79 | N  |             |        | N  |             |       | N  |
| Cataract                                                 | 86       | 2.97%              | 1.62 | Y  | 1.01%       | 7.31   | Y  | 0.89%       | 3.50  | N  |
| Other eye disorders                                      | 91       | 1.03% <sup>*</sup> | 1.20 | N  | 1.25%       | 3.09   | N  | 0.89%       | 2.19  | N  |
| Other nervous system disorders                           | 95       | 2.48%              | 1.62 | Y  | 0.96%       | 1.58   | N  | 2.21%       | 2.26  | Y  |
| Heart valve disorders                                    | 96       | 0.91%              | 0.94 | N  |             |        | N  |             |       | N  |
| Essential hypertension                                   | 98       | 58.39%             | 2.90 | Y  | 14.83%      | 33.93  | Y  | 24.42%      | 10.03 | Y  |
| Acute myocardial infarction                              | 100      | 2.13%              | 2.22 | Y  | 0.61%       | 30.04  | N  | 0.85%       | 6.24  | N  |
| Coronary atherosclerosis & other heart disease           | 101      | 23.89%             | 2.39 | Y  | 2.04%       | 33.45  | Y  | 3.20%       | 7.58  | Y  |
| Conduction disorders                                     | 105      | 1.12%              | 1.45 | Y  | 0.73%       | 7.30   | N  | 0.37%       | 2.47  | N  |
| Cardiac dysrhythmias                                     | 106      | 6.87%              | 1.23 | Y  | 0.87%       | 2.40   | N  | 1.32%       | 1.63  | Y  |
| Congestive heart failure, Nnhypertensivw                 | 108      | 9.90%              | 1.77 | Y  | 1.24%       | 7.34   | Y  | 1.79%       | 3.65  | Y  |
| Acute cerebrovascular disease                            | 109      | 16.93%             | 2.04 | Y  | 2.12%       | 9.38   | Y  | 2.42%       | 2.86  | Y  |
| Occlusion or steNsis of precerebral arteries             | 110      | 2.34%              | 3.41 | Y  | 0.59%       | 74.49  | N  | 0.81%       | 17.48 | N  |
| Other & ill-defined cerebrovascular disease              | 111      | 6.49%              | 2.37 | Y  | 1.01%       | 15.71  | Y  | 1.41%       | 5.78  | Y  |
| Transient cerebral ischemia                              | 112      | 7.31%              | 1.75 | Y  | 0.69%       | 11.89  | N  | 1.85%       | 3.71  | Y  |
| Peripheral & visceral atheroscleros                      | 114      | 3.25%              | 4.21 | Y  | 0.56%       | 25.59  | N  | 0.92%       | 14.90 | N  |
| Pneumonia                                                | 122      | 4.53%              | 1.30 | Y  | 2.45%       | 1.69   | Y  | 2.48%       | 1.45  | Y  |
| Acute bronchitis                                         | 125      | 2.25%              | 1.73 | Y  | 1.17%       | 3.20   | Y  | 1.59%       | 2.56  | Y  |
| Other upper respiratory infections                       | 126      | 2.55%              | 1.43 | Y  | 6.33%       | 5.10   | Y  | 4.33%       | 2.83  | Y  |
| Chronic obstructive pulmonary disease and bronchiectasis | 127      | 4.65%              | 0.93 | N  |             |        | N  |             |       | N  |
| Other lower respiratory disease                          | 133      | 4.94%              | 1.41 | Y  | 2.79%       | 2.19   | Y  | 3.02%       | 2.60  | Y  |
| Biliary tract disease                                    | 149      | 4.53%              | 1.02 | Y  | 5.19%       | 5.03   | Y  | 5.83%       | 2.33  | Y  |
| Other liver diseases                                     | 151      | 7.97%              | 1.99 | Y  | 22.00%      | 34.00  | Y  | 19.49%      | 10.51 | Y  |
| Nninfected gastroenteritis                               | 154      | 1.33%              | 1.12 | Y  | 1.87%       | 3.67   | Y  | 1.12%       | 1.68  | Y  |
| Chronic renal failure                                    | 158      | 4.42%              | 2.77 | Y  | 3.37%       | 5.14   | Y  | 3.45%       | 3.25  | Y  |
| Urinary tract infections                                 | 159      | 6.51%              | 2.91 | Y  | 6.09%       | 10.70  | Y  | 4.41%       | 5.06  | Y  |
| Hyperplasia of prostate                                  | 164      | 1.75%              | 1.20 | N  | 0.39%       | 59.57  | N  | 0.30%       | 7.94  | N  |
| Skin & subcutaneous tissue infections                    | 197      | 1.21%              | 1.88 | Y  | 2.20%       | 6.30   | Y  | 1.23%       | 3.04  | Y  |

CCS: Clinical Classifications Software; ACoR: absolute co-occurrence risk; RCoR: relative co-occurrence risk; MC: Major comorbidity

<sup>#</sup> p-value = 0.132 compared to 1%; <sup>\*</sup> p-value = 0.024 compared to 1%
